# Supplementary material for: Evaluation of protein biomarkers of prostate cancer aggressiveness
Source: Springer Nature journal article supplement (doi:10.1186/1471-2407-14-244), 2014-04-05
Supplement: 12885_2013_4409_MOESM12_ESM.pdf [file 12885_2013_4409_MOESM12_ESM.pdf]

**Additional file 12: Table S11.** Composition of the final 11-gene model validated in the Lapointe dataset.

| <b>Rank</b> | <b>Gene</b> | <b>Description</b>                               | <b>Weighted Average <math>S_x</math> Score</b> |
|-------------|-------------|--------------------------------------------------|------------------------------------------------|
| 1           | CASR        | calcium-sensing receptor                         | -0.41051                                       |
| 2           | ACPP        | acid phosphatase, prostate                       | 0.38730                                        |
| 3           | GADD45B     | growth arrest and DNA-damage-inducible, beta     | 0.36906                                        |
| 4           | PLIN2       | perilipin 2                                      | 0.35674                                        |
| 5           | ALDH1A2     | aldehyde dehydrogenase 1 family, member A2       | 0.35287                                        |
| 6           | ADAM9       | ADAM metallopeptidase domain 9                   | 0.34676                                        |
| 7           | CCPG1       | cell cycle progression 1                         | 0.34670                                        |
| 8           | HOXC6       | homeobox C6                                      | -0.34553                                       |
| 9           | IQCK        | IQ motif containing K                            | 0.34255                                        |
| 10          | IGF1        | insulin-like growth factor 1 (somatomedin C)     | 0.34054                                        |
| 11          | PAGE4       | P antigen family, member 4 (prostate associated) | 0.34008                                        |
